# Supplementary material for: Perlecan Facilitates Neuronal Nitric Oxide Synthase Delocalization in Denervation-Induced Muscle Atrophy
Source: Cells. 2020 Nov 23;9(11):2524. doi: 10.3390/cells9112524 (PMC7700382; doi:10.3390/cells9112524)
Supplement: Supplementary file 1 [file cells-09-02524-s001.pdf]

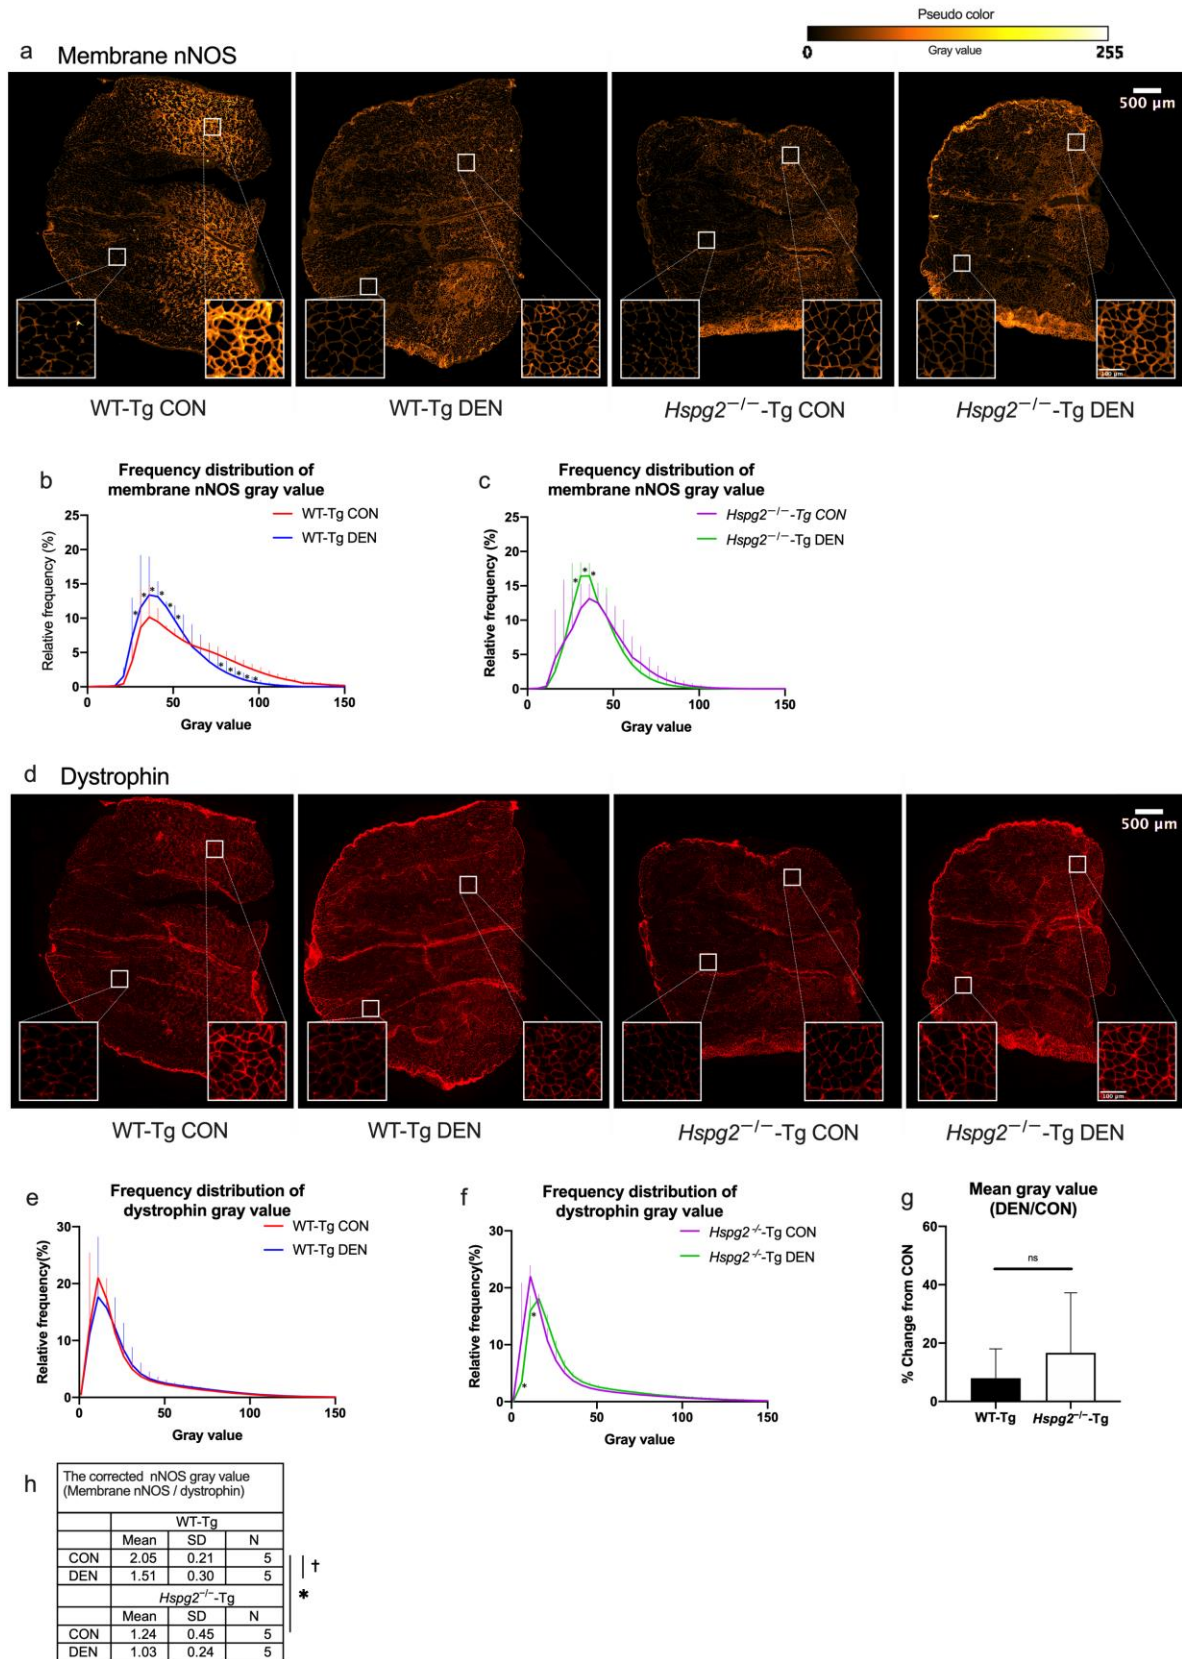

**Figure S1.** (a) Membrane nNOS-extracted images obtained by image processing. Based on the nNOS and dystrophin immunostaining images of the gastrocnemius muscle, the nNOS signal co-localized with dystrophin was extracted as a membrane nNOS by image

processing. The right side of the section was the deep region of the muscle. Fluorescence intensity is indicated by pseudo-colors. In the upper right corner, the pseudo-color conversion lookup table is shown. Inserts show magnified views of each image. **(b)** Frequency distribution of gray values for membrane nNOS immunostaining of the WT-Tg gastrocnemius muscle sections. Compared to WT-Tg CON (control) samples, the gray value distribution shifted to lower values in the WT-Tg DEN (denervated) samples. \*: a significant difference was observed between CON and DEN. **(c)** Frequency distribution of gray values for membrane nNOS immunostaining of the *Hspg2<sup>-/-</sup>*-Tg gastrocnemius muscle sections. A smaller shift in the frequency distribution was observed compared to *Hspg2<sup>-/-</sup>*-Tg CON and DEN. **(d)** Immunofluorescence images of gastrocnemius muscle whole cross-sections showing dystrophin expression. **(e)** Frequency distribution of gray values for dystrophin immunostaining of the WT-Tg gastrocnemius muscle sections. Gray value distribution did not change significantly between WT-Tg CON and WT-Tg DEN ( $P > 0.05$ ). **(f)** Frequency distribution of gray values for dystrophin immunostaining of the *Hspg2<sup>-/-</sup>*-Tg gastrocnemius muscle sections. Comparison of *Hspg2<sup>-/-</sup>*-Tg CON and DEN revealed significant differences at lower gray values ( $P < 0.05$ ), but the overall shift was slight. **(g)** Percent change (from CON to DEN) in the mean gray value of dystrophin. A significant difference was not observed between WT-Tg CON and DEN nor between *Hspg2<sup>-/-</sup>*-Tg CON and DEN ( $P > 0.05$ ). Values are expressed as the mean  $\pm$  SD. **(h)** The corrected nNOS gray value calculated from the membrane nNOS gray value and dystrophin immunostaining gray value. †: a significant difference was observed between WT-Tg CON and WT-Tg DEN ( $P < 0.05$ ). \*: a significant difference was observed between WT-Tg CON and *Hspg2<sup>-/-</sup>*-Tg CON ( $P < 0.05$ ).
